# Supplementary material for: Engineering GaN/AuNC core–shell nanowire heterojunctions by gold nanoclusters with excitation-dependent behavior for enhancing the responsivity and stability of self-driven photodetectors
Source: Royal Society of Chemistry journal article supplement (doi:10.1039/d3na00463e), 2023-01-01
Supplement: d3na00463e1.pdf [file d3na00463e1.pdf]

## Supporting Information

### Engineering GaN/AuNC core-shell nanowire heterojunction by gold nanoclusters with excitation-dependent behavior to enhance the responsivity and stability of self-driven photodetector

Yuanyuan Huang,<sup>a</sup> Jianya Zhang,<sup>b,c</sup> Min Zhou,<sup>d</sup> Renjun Pei<sup>\*a,d</sup> and Yukun Zhao<sup>\*c,d</sup>

<sup>a</sup> CAS Key Laboratory for Nano-Bio Interface, Suzhou Institute of Nano-Tech and Nano-Bionics (SINANO), Chinese Academy of Sciences (CAS), Suzhou, 215123, China

<sup>b</sup> Jiangsu Key Laboratory of Micro and Nano Heat Fluid Flow Technology and Energy Application, School of Physical Science and Technology, Suzhou University of Science and Technology, Suzhou, 215009, China

<sup>c</sup> Key Lab of Nanodevices and Applications, Suzhou Institute of Nano-Tech and Nano-Bionics (SINANO), Chinese Academy of Sciences (CAS), Suzhou, 215123, China

<sup>d</sup> School of Nano-Tech and Nano-Bionics, University of Science and Technology of China, Hefei, 230026, China

\* Corresponding authors: [rjpei2011@sinano.ac.cn](mailto:rjpei2011@sinano.ac.cn); [ykzhao2017@sinano.ac.cn](mailto:ykzhao2017@sinano.ac.cn)

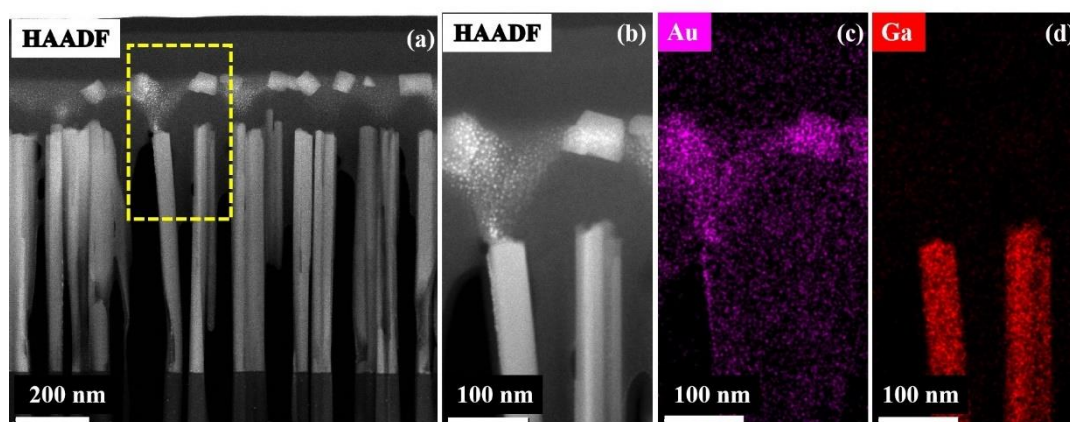

**Figure S1.** The scanning transmission electron microscope (STEM) images of GaN/AuNC hybrid NWs array with energy dispersive X-ray (EDX) mapping images (yellow dashed box).

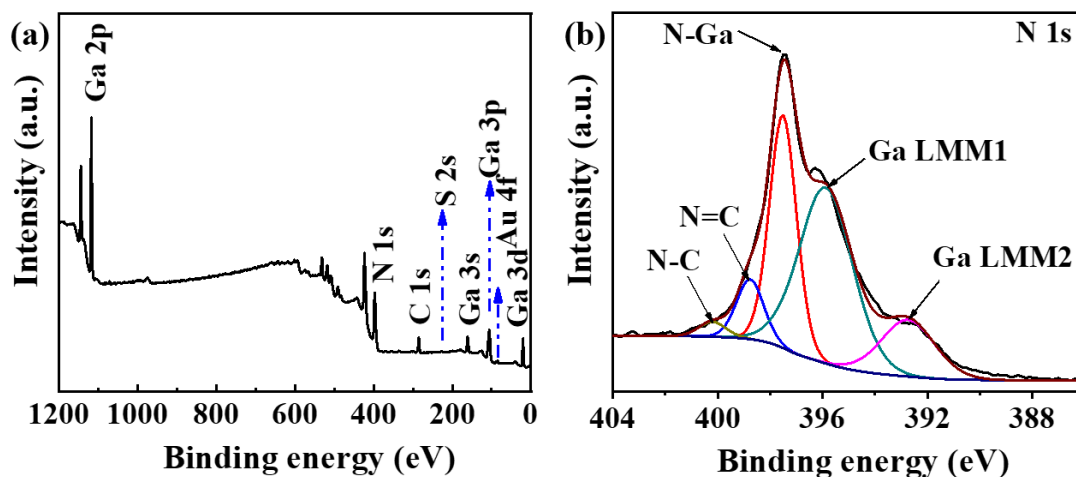

**Figure S2.** (a) Full spectrum of X-ray photoelectron spectroscopy (XPS) and (b) N 1s spectrum of GaN/AuNC hybrid nanowires (NWs).

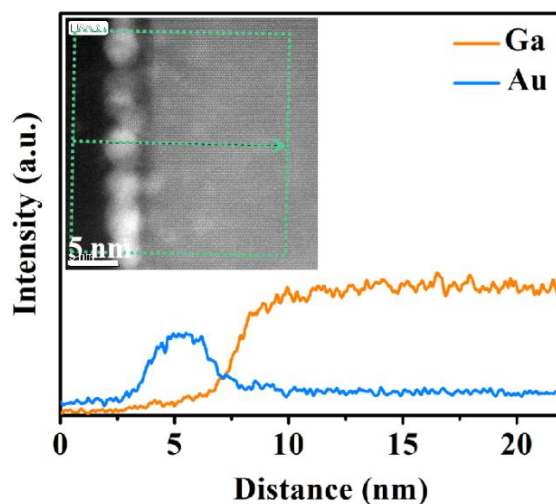

**Figure S3.** EDX scanning profiles of a single GaN/AuNC hybrid NW along the line displayed in the STEM image (inset). The inset corresponds to Figure 2c.

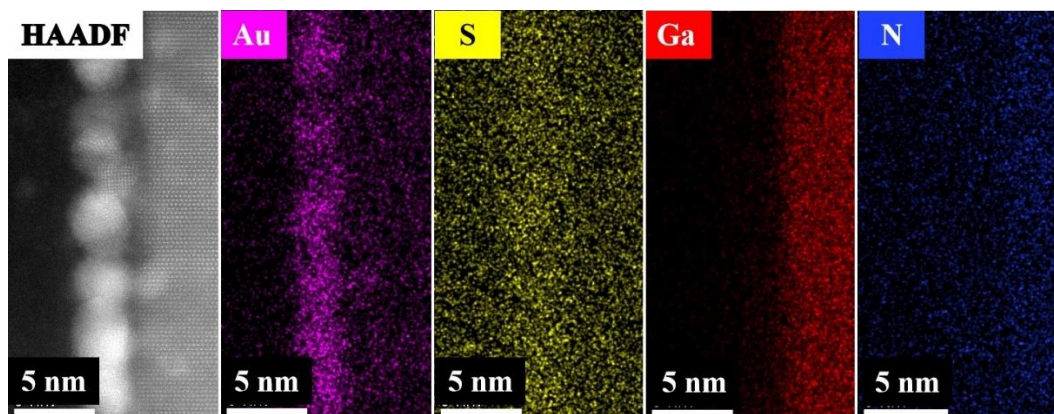

**Figure S4.** The STEM images of GaN/AuNC hybrid NW with EDX mapping images. Some images corresponds to Figure 2c and 2d, which are used for better comparison.

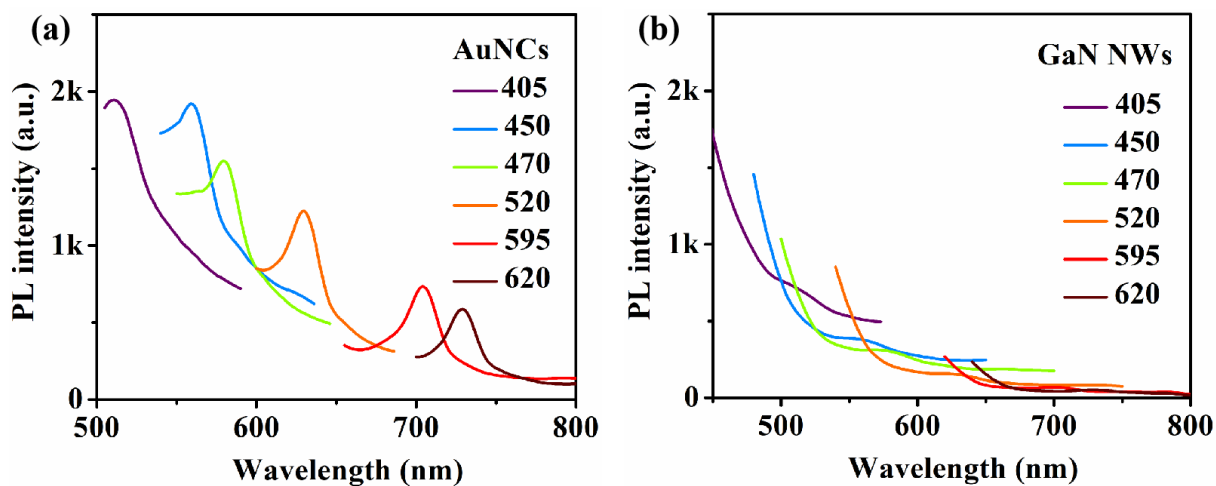

**Figure S5.** Photoluminescence (PL) spectra of (a) pure AuNCs on glass and (b) GaN NWs under different excitation wavelengths from 405 nm to 620 nm.

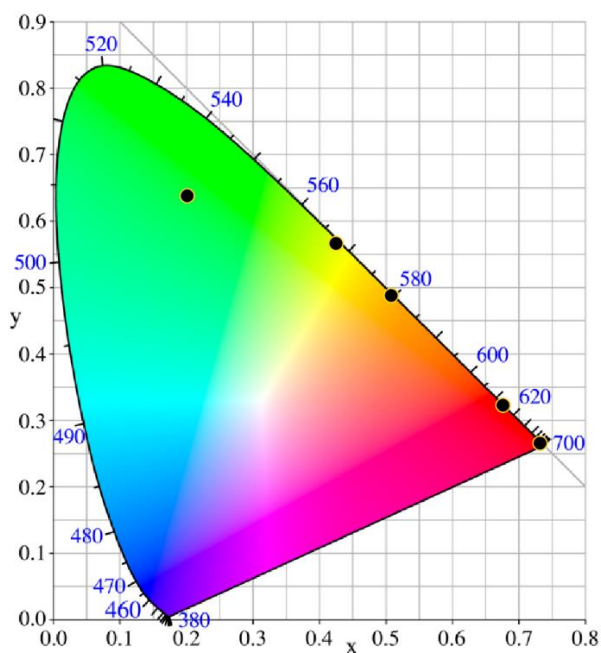

**Figure S6.** Tunable emission colors of GaN/AuNC hybrid NWs (black data points) plotted on Commission International de l'Eclairage (CIE) chromaticity coordinates under different excitation wavelengths from 405 nm to 620 nm.

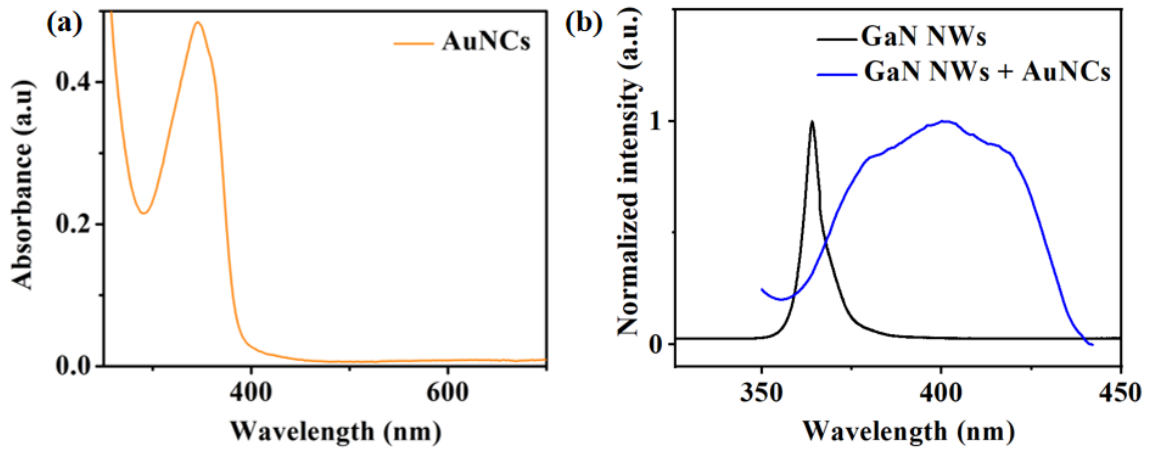

**Figure S7.** (a) UV-Vis absorption spectra of AuNCs in dimethyl sulfoxide (DMSO) solution. (b) The emission spectra of GaN with and without AuNCs under 310 nm illumination.

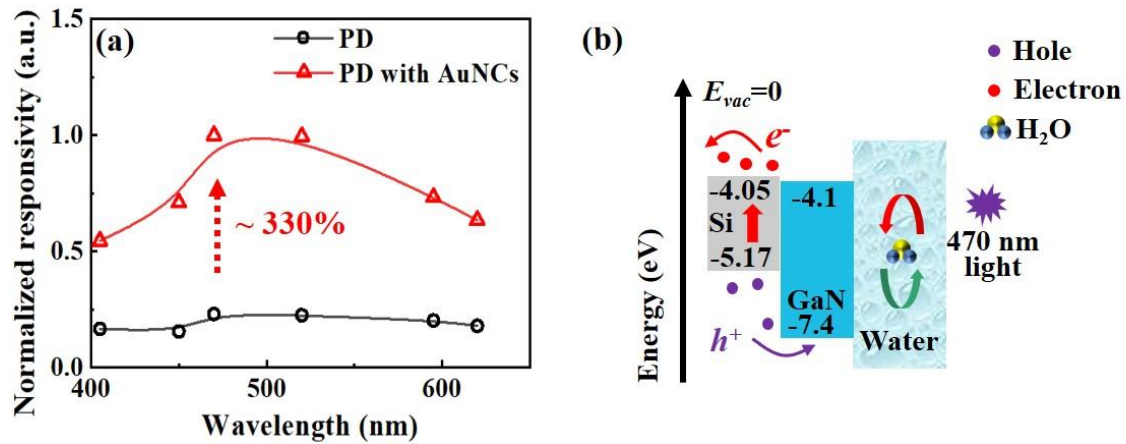

**Figure S8.** (a) Normalized responsivity of photodetectors (PDs) at different wavelengths. (b) The energy band diagram of the PD without AuNCs under 470 nm illumination.

**Table S1.** Comparison between metal nanocluster-based PDs and this work.

| Materials                          | Wavelength (nm) | Bias voltage (V) | Reference |
|------------------------------------|-----------------|------------------|-----------|
| Au NCs/SiO <sub>2</sub> /Si        | 635             | 60               | S1        |
| CdSe NPLs and Au <sub>25</sub> NCs | Sunlight        | 2                | S2        |
| GSH-Au NCs/Graphene                | 325             | 0.1              | S3        |
| Au-QDs                             | 405             | 0                | S4        |
| GaN NWs + AuNCs                    | 310 - 620       | 0                | This work |

## References

- S1. M. Galchenko, A. Black, L. Heymann, C. Klinke, *Adv. Mater.*, 2019, **31**, 1900684.
- S2 A. Medda, A. Dutta, D. Bain, M. K. Mohanta, A. De Sarkar, A. Patra, *J. Phys. Chem. C*, 2020, **124**, 19793.
- S3 A. Thakran, A. Nain, M. Kataria, C. R. Paul Inbaraj, H.-Y. Lin, H.-I. Lin, Y.-M. Liao, C.-F. Hou, C.-C. Wang, H.-T. Chang, Y.-F. Chen, *ACS Photonics*, 2021, **8**, 2955.
- S4 N. Zhou, H. Zhao, X. Li, P. Li, Y. You, M. Cai, L. Xia, H. Zhi, A. I. Channa, Z. M. Wang, X. Tong, *ACS Mater. Lett.*, 2023, **5**, 1209.
